# Supplementary material for: Pharmacokinetic Monitoring of Levetiracetam in Portuguese Refractory Epileptic Patients: Effect of Gender, Weight and Concomitant Therapy
Source: MDPI journal article supplement (doi:10.3390/pharmaceutics12100943), 2020-10-01
Supplement: s1 [file s1]

# Supplementary Materials: Pharmacokinetic Monitoring of Levetiracetam in Portuguese Refractory Epileptic Patients: Effect of Gender, Weight and Concomitant Therapy

Rui Silva, Anabela Almeida, Joana Bicker, Joana Gonçalves, Andreia Carona, Ana Silva, Isabel Santana, Francisco Sales, Amílcar Falcão and Ana Fortuna

**Table S1.** Number of patients and of levetiracetam plasma concentrations included in the analysis.

|                                       | <b>Patients<br/>(Plasma<br/>concentrations)</b> | <b>Patients<br/>(Cmin plasma<br/>concentrations)</b> | <b>Patients<br/>(1 h post dose plasma<br/>concentrations)</b> | <b>Patients<br/>(Additional Cmin plasma<br/>concentrations)</b> |
|---------------------------------------|-------------------------------------------------|------------------------------------------------------|---------------------------------------------------------------|-----------------------------------------------------------------|
| Patients with 2 plasma concentrations | 25 (50)                                         | 25 (25)                                              | 25 (25)                                                       | 0 (0)                                                           |
| Patients with 3 plasma concentrations | 18 (54)                                         | 18 (18)                                              | 18 (18)                                                       | 18 (18)                                                         |
| Patients with 4 plasma concentrations | 5 (20)                                          | 5 (5)                                                | 5 (5)                                                         | 5 (10)                                                          |
| <b>Total</b>                          | <b>48 (124)</b>                                 | <b>48 (48)</b>                                       | <b>48 (48)</b>                                                | <b>23 (28)</b>                                                  |

Cmin, Minimum plasma concentration
